# Supplementary material for: Synthesis and physicochemical characterization of novel phenotypic probes targeting the nuclear factor-kappa B signaling pathway
Source: publisher site journal article supplement (doi:10.3762/bjoc.9.103), 2013-05-08

# Supporting Information

for

## Synthesis and physicochemical characterization of novel phenotypic probes targeting the nuclear factor-kappa B signaling pathway

Paul M. Hershberger<sup>1</sup>, Satyamaheshwar Peddibhotla<sup>1</sup>, E. Hampton Sessions<sup>1</sup>, Daniela B. Divlianska<sup>1</sup>, Ricardo G. Correa<sup>2</sup>, Anthony B. Pinkerton<sup>2</sup>, John C. Reed<sup>2</sup> and Gregory P. Roth\*<sup>1</sup>

Address: <sup>1</sup>Conrad Prebys Center for Chemical Genomics, Sanford-Burnham Medical Research Institute at Lake Nona, 6400 Sanger Road Orlando, FL 32827, USA and <sup>2</sup>Sanford-Burnham Medical Research Institute, 10901 North Torrey Pines Road, La Jolla, CA 92037, USA

Email: Gregory P. Roth - groth@sanfordburnham.org

\*Corresponding author

NMR Spectra for ML029 (**4**), ML236 (**8**), ML237 (**12**), ML130 (**13**) and ML146 (**17**).

ML029 (4). <sup>1</sup>H NMR and <sup>13</sup>C NMR spectra.

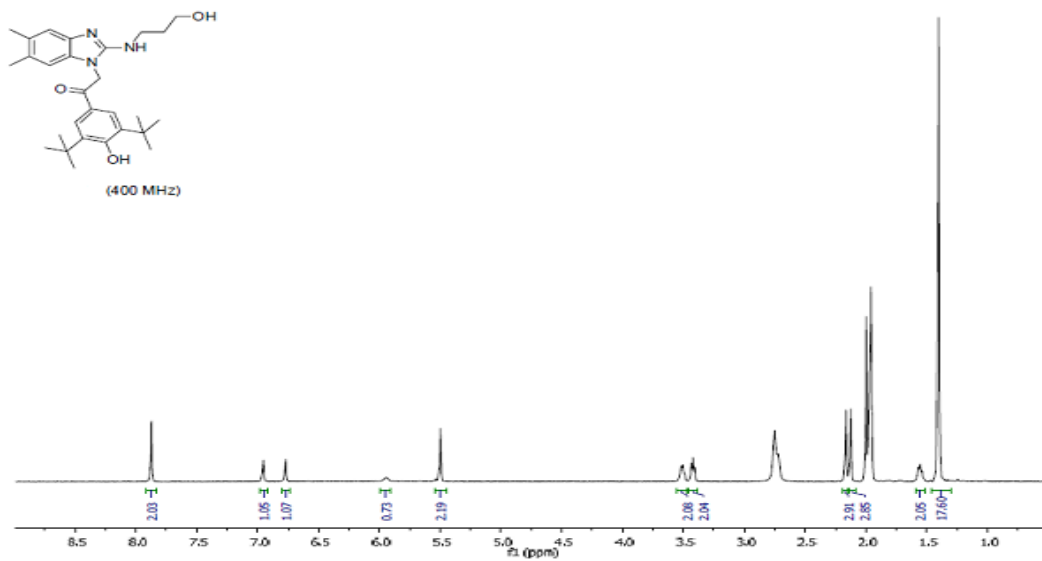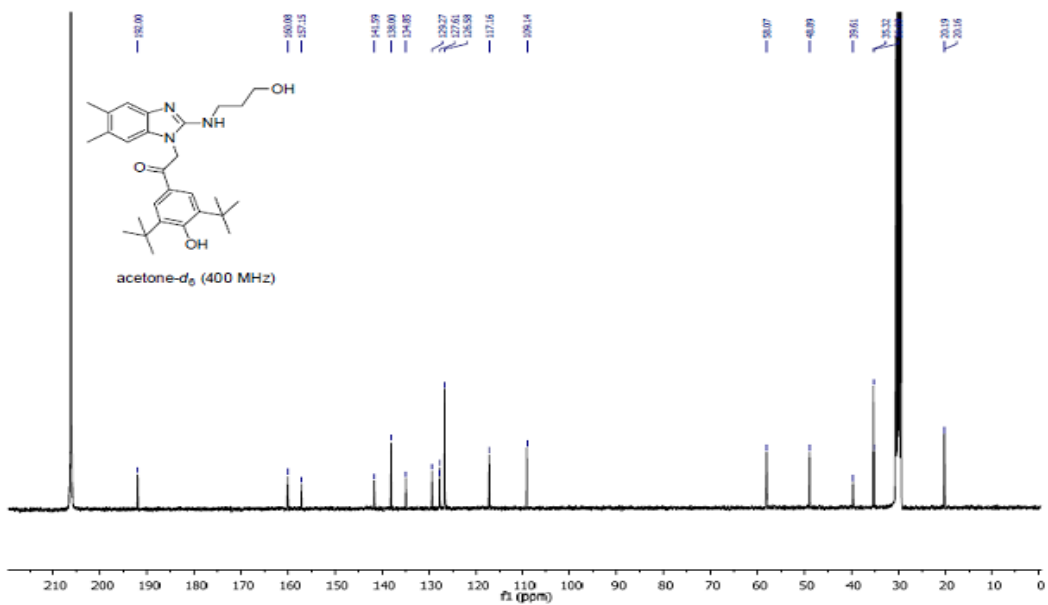

ML236 (8).  $^1\text{H}$  NMR,  $^{13}\text{C}$  NMR spectra.

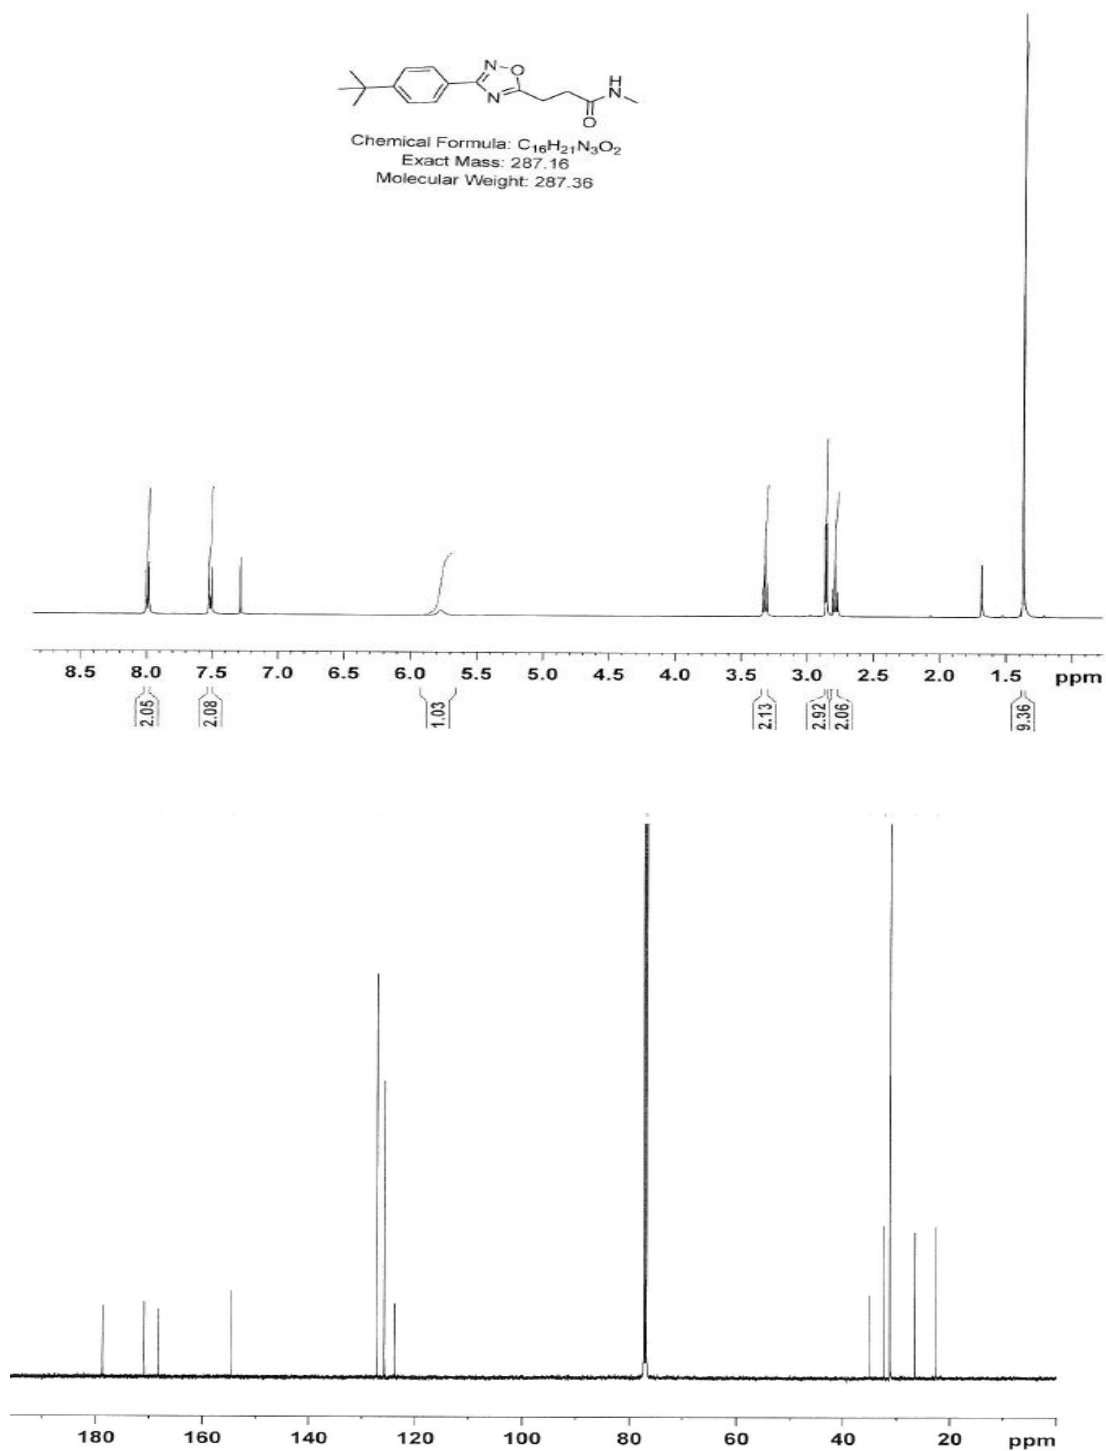

ML237 (12).  $^1\text{H}$  NMR and  $^{13}\text{C}$  NMR spectra.

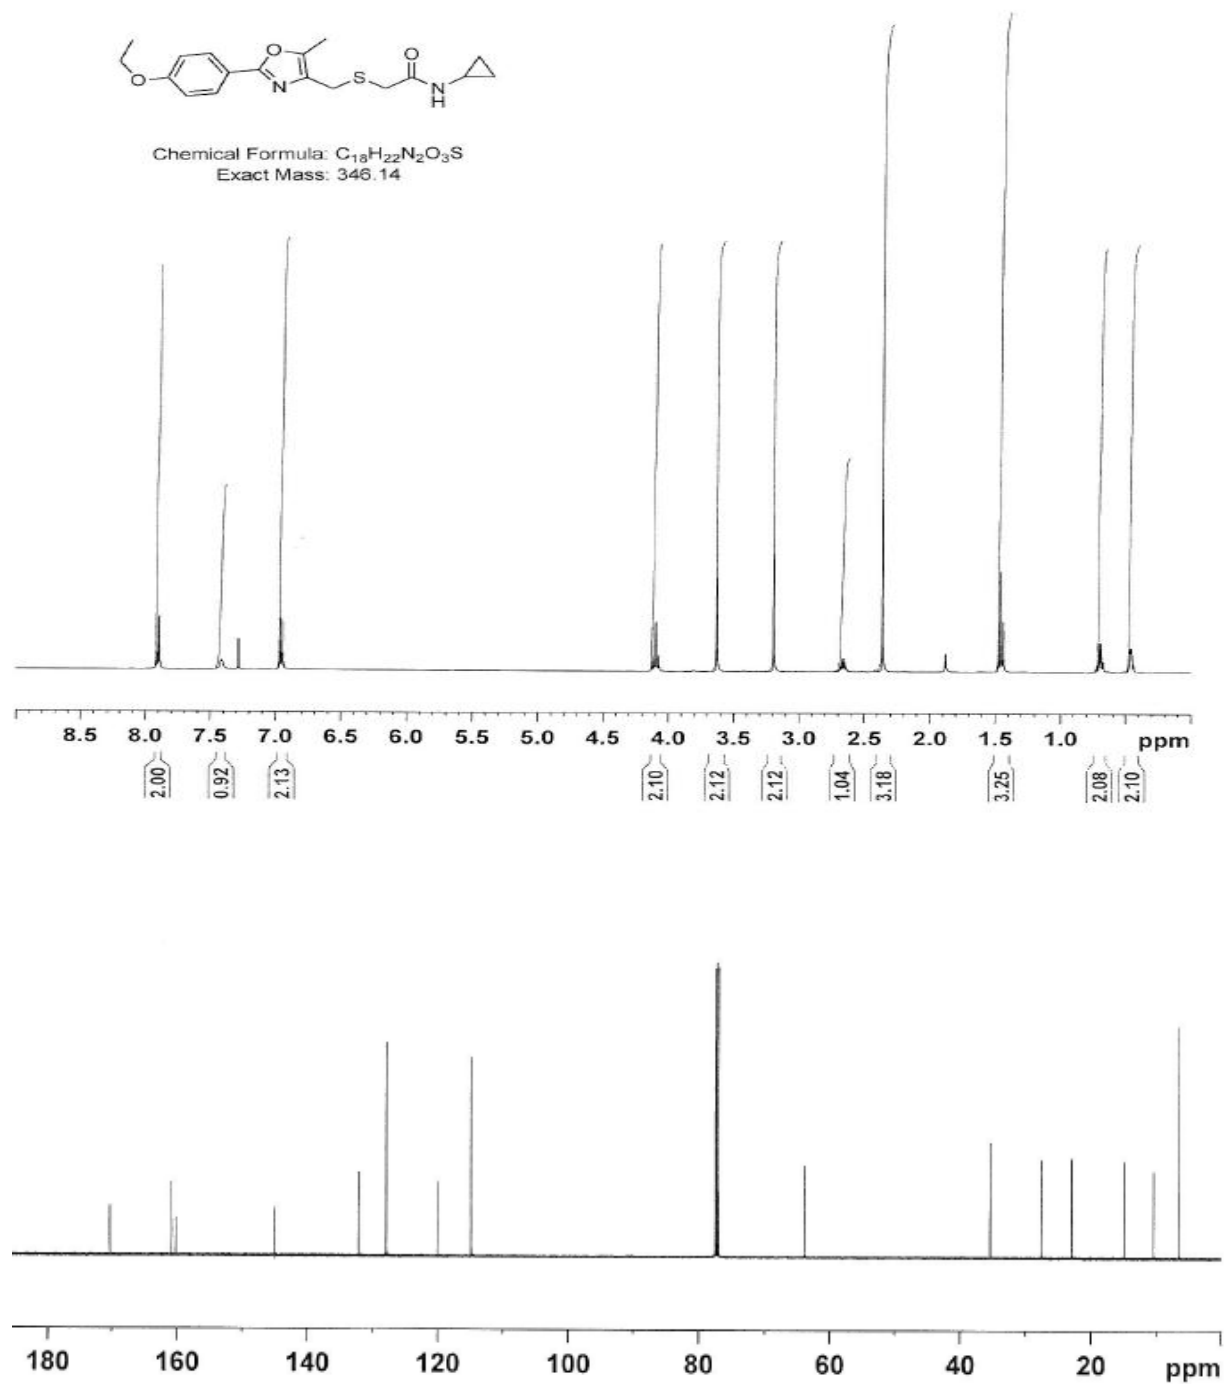

ML130 (13).  $^1\text{H}$  NMR and  $^{13}\text{C}$  NMR spectra.

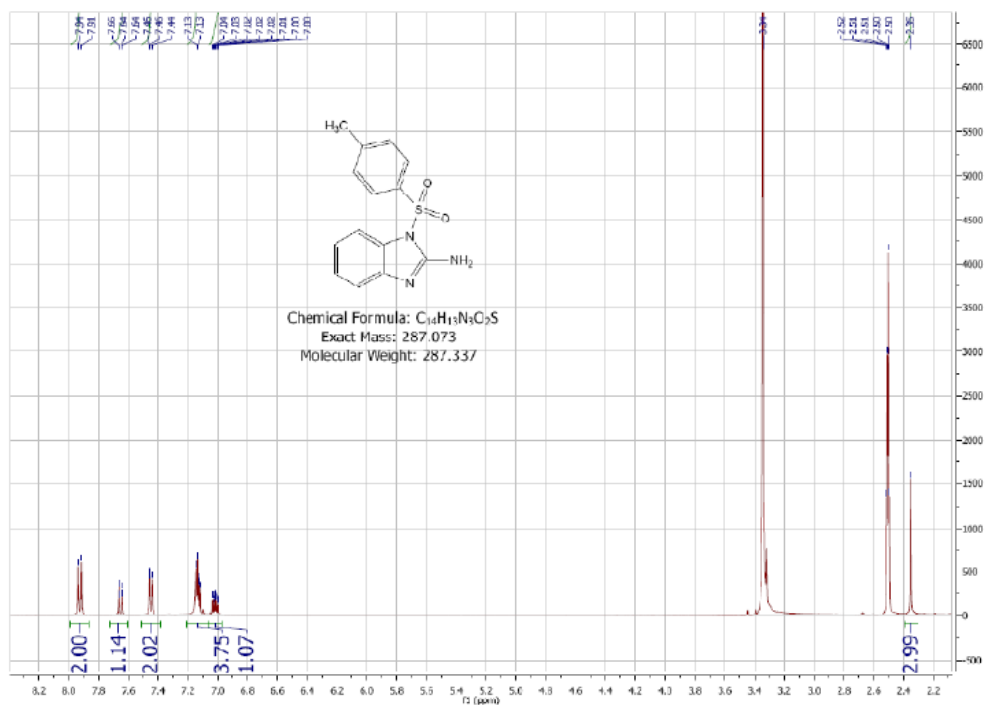

//nova/special\_proj/NMR-500/data/ph/nmr/Oct01-2012-ph/10/pdata/1/1rOct01-2012-ph  
PMH-0040-146A  
MLS-0350096.0003

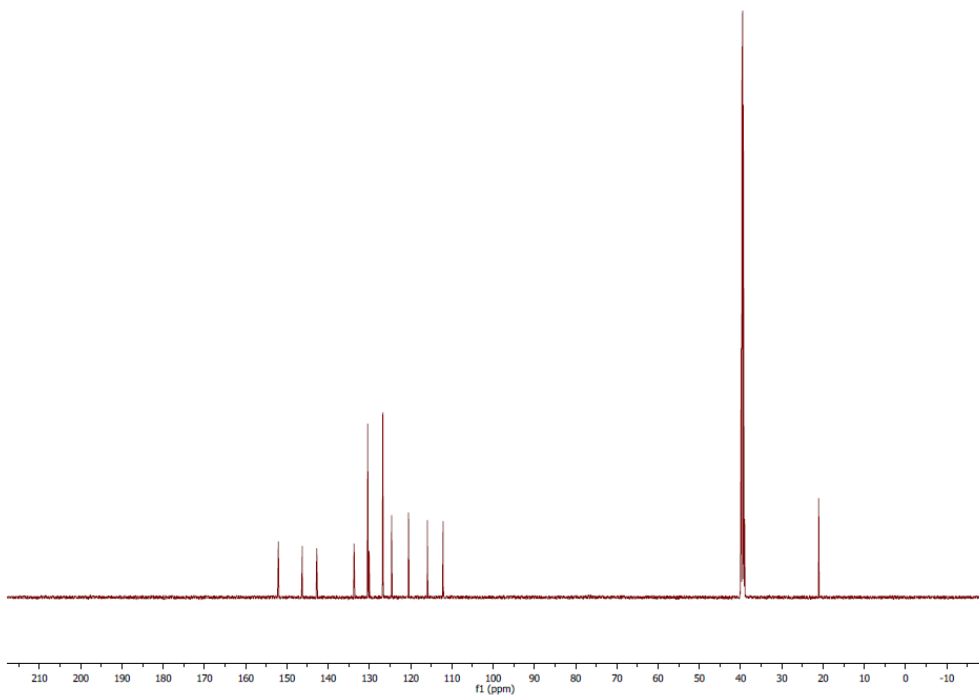

ML146 (17). <sup>1</sup>H NMR and <sup>13</sup>C NMR spectra.

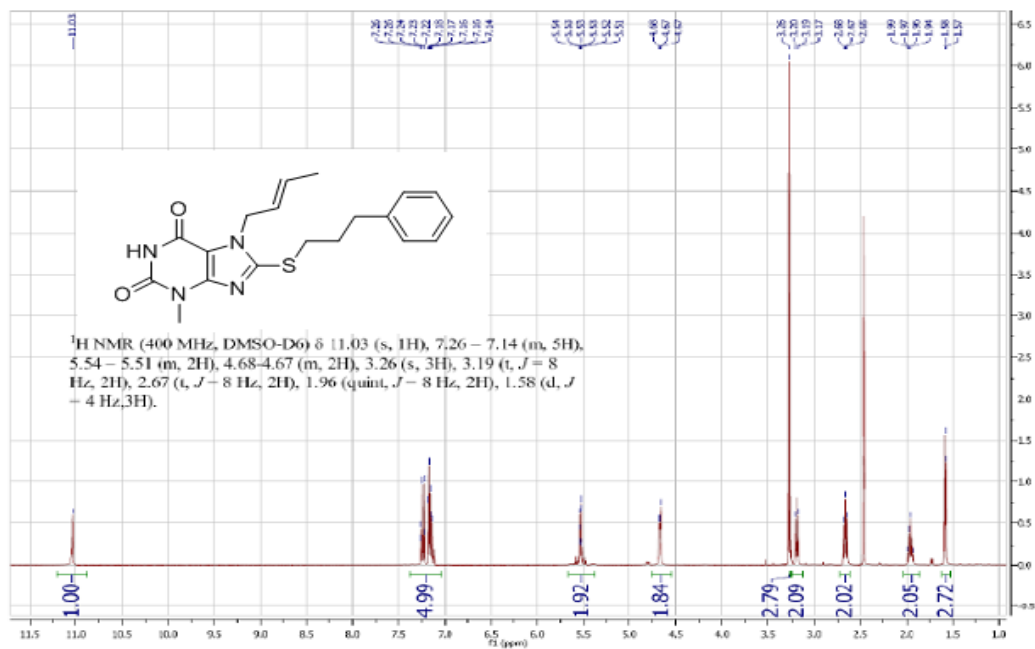

//nova/special\_proj/NMR-500/data/ph/nmr/Oct01-2012-ph/20/pdata/1/1/Oct01-2012-ph  
 PMH-0040-146B  
 MLS-0012325.0002

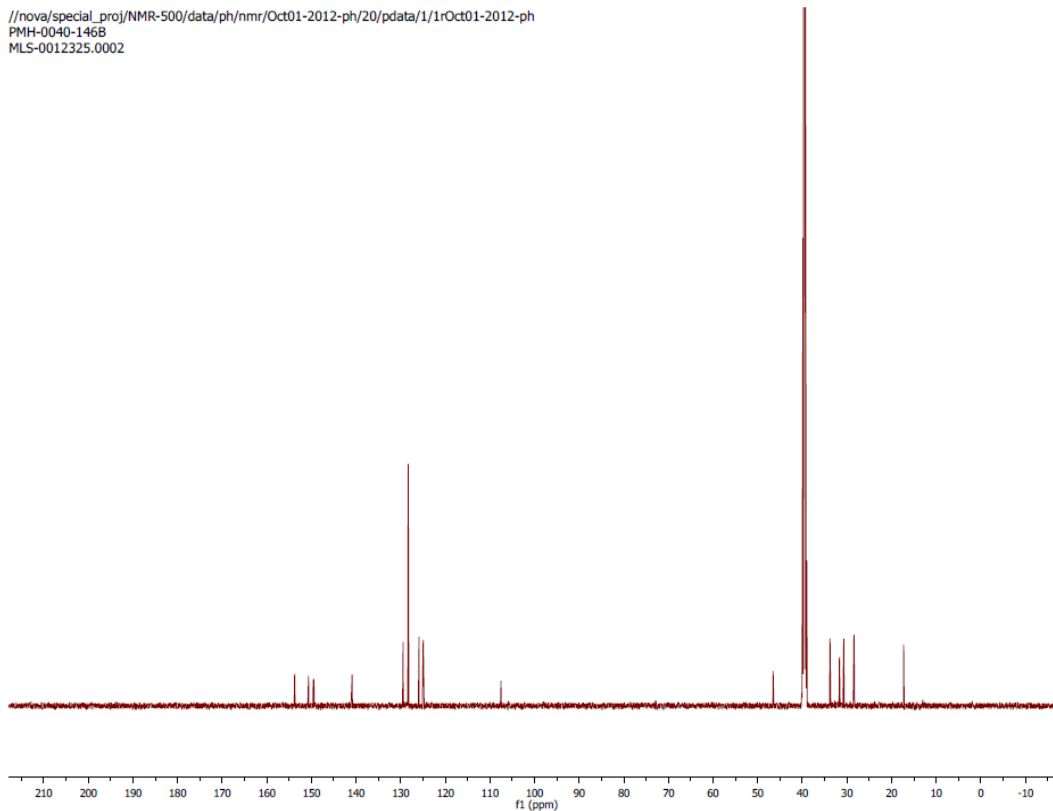

Supplement: Additional file 2 [file 1860-5397-9-103-S2.pdf]
